# Supplementary material for: Parent-of-origin effects in the life-course evolution of cardiometabolic traits
Source: Springer Nature journal article supplement (doi:10.1007/s00125-025-06396-5), 2025-04-02

ESM figure 1: STROBE flow diagram of the Pune Maternal Nutrition Study. Maximum numbers available are mentioned. Not all data may be available on the mentioned numbers.

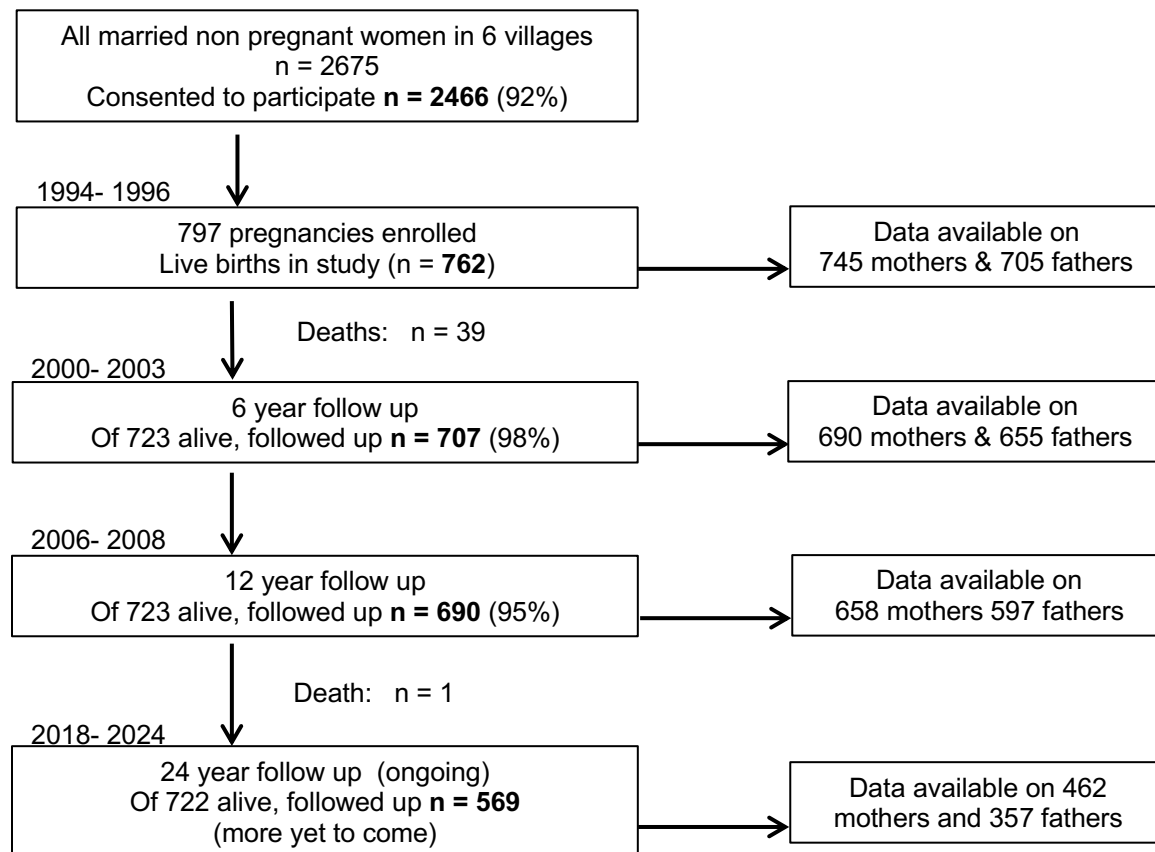

2a

Bar graphs of regression coefficients and Z values across time points

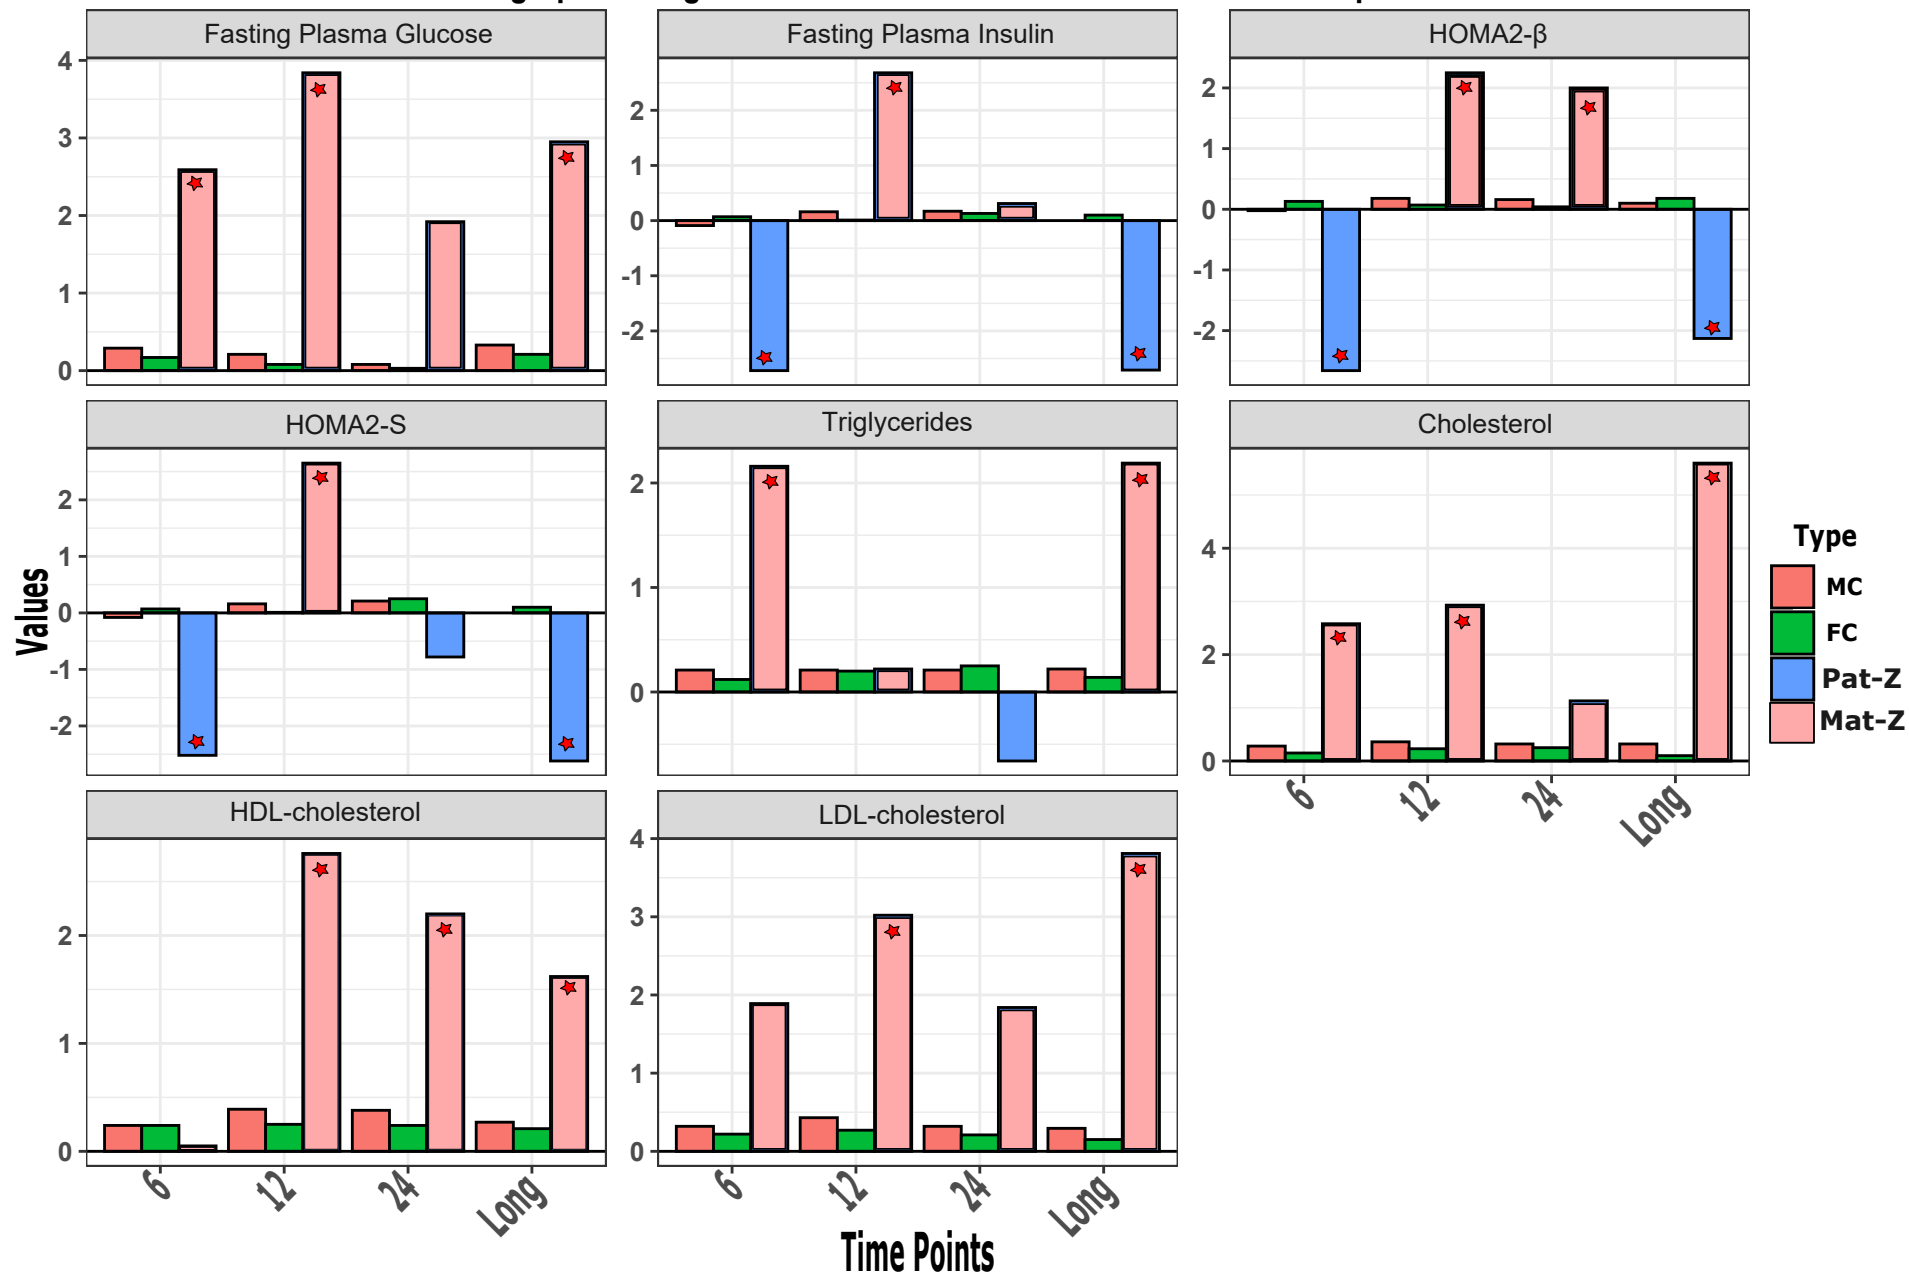

## Parent-of-origin effects Z values for longitudinal analysis

2b

Mother

Father

Fasting Plasma  
Glucose

Fasting Plasma  
Insulin

HOMA2- $\beta$

HOMA2-S

Triglycerides

Cholesterol

HDL

LDL

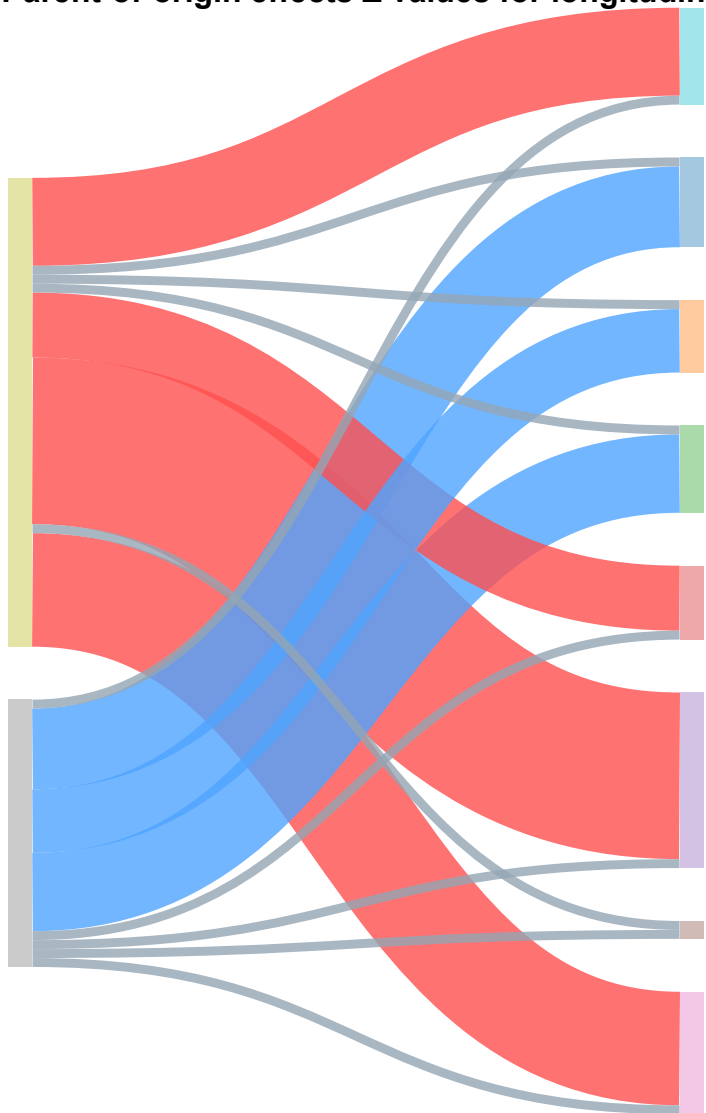

Supplement: MOESM1 [file 125_2025_6396_MOESM1_ESM.pdf]
